# Inhaltsverzeichnis

|                                                                                 |     |
|---------------------------------------------------------------------------------|-----|
| Vorwort .....                                                                   | VII |
| Einleitung .....                                                                | 1   |
| I. Das semantische Interesse an Frames.....                                     | 7   |
| 1. Evidenzen für Frames: einige Beispiele zur Einführung .....                  | 7   |
| 2. Frames in der Forschung .....                                                | 13  |
| 2.1 Zur Entwicklung der Frame-Forschung.....                                    | 14  |
| 2.2 Frames und andere Repräsentationsformate.....                               | 22  |
| 3. Frames im kognitionswissenschaftlichen Kontext .....                         | 35  |
| 3.1 Kognition, Repräsentation, Kategorisierung: zum<br>Gegenstandsbereich ..... | 35  |
| 3.2 Kognitionstheoretische Positionen.....                                      | 43  |
| 3.3 Frames im Spannungsfeld modularistischer und holistischer<br>Ansätze.....   | 51  |
| II. Kognitionstheoretische Voraussetzungen .....                                | 59  |
| 1. Holismus vs. Modularismus: ein Beispiel zur Illustration .....               | 60  |
| 2. Modularismus.....                                                            | 66  |
| 2.1 Zwei-Ebenen-Semantik (M. Bierwisch).....                                    | 67  |
| 2.2 Frame-Semantik vs. Zwei-Ebenen-Semantik: einige<br>Problemfelder.....       | 73  |
| 2.3 Beispielanalysen.....                                                       | 78  |
| 2.4 Drei-Ebenen-Semantik (M. Schwarz) .....                                     | 92  |
| 3. Holismus .....                                                               | 103 |
| 3.1 Bedeutung als Konzeptualisierung.....                                       | 105 |
| 3.2 Sprache als Konzeptualisierung (R. Langacker vs.<br>R. Jackendoff) .....    | 108 |
| III. Das holistische Paradigma.....                                             | 117 |
| 1. Sind Sprachwissen und Weltwissen voneinander abgrenzbar?.....                | 119 |
| 1.1 Essenz vs. Akzidenz? .....                                                  | 125 |
| 1.2 Synthetische vs. analytische Urteile?.....                                  | 128 |
| 1.3 Kulturelles vs. sprachliches Wissen?.....                                   | 130 |

|                                                                                                 |     |
|-------------------------------------------------------------------------------------------------|-----|
| 1.4 Semantik vs. Pragmatik? .....                                                               | 133 |
| 2. Der „Raum des Verstehens“ (C. Demmerling) .....                                              | 142 |
| 3. Das Postulat der Verstehensrelevanz .....                                                    | 150 |
| 3.1 Busses Konzeption einer explikativen Semantik .....                                         | 151 |
| 3.2 Ansätze der psycholinguistischen Verstehensforschung .....                                  | 157 |
| 3.3 Wissenstypen im Vergleich .....                                                             | 167 |
| IV. Zeichentheoretische Aspekte .....                                                           | 173 |
| 1. Sprachliche Zeichen als „Konstruktionen“ .....                                               | 177 |
| 1.1 Das „symbolische Prinzip“ in der Konstruktionsgrammatik<br>und Kognitiven Grammatik .....   | 177 |
| 1.2 Was sind „Konstruktionen“ und „symbolische Einheiten“? .....                                | 180 |
| 1.3 Konstruktionen im „Raum des Verstehens“ .....                                               | 192 |
| 2. Frames und „symbolische Einheiten“ .....                                                     | 198 |
| 2.1 Konventionelle vs. kontextuelle Bedeutungsaspekte<br>(R. Langacker) .....                   | 200 |
| 2.2 Sind „Situationen“ und „Hintergründe“ Elemente<br>semantischer Einheiten? (J. Zlatev) ..... | 211 |
| 2.3 Sind „Szenen“ Elemente semantischer Einheiten?<br>(C. Fillmore) .....                       | 221 |
| 3. Relationen .....                                                                             | 229 |
| 3.1 „Aufgerufene“ Frames und „abgerufene“ Frames (C. Fillmore) .....                            | 231 |
| 3.2 „Bedeutungspotentiale“ (J. Allwood) .....                                                   | 237 |
| V. Frames als Schemata .....                                                                    | 247 |
| 1. Kategorisierung .....                                                                        | 248 |
| 2. Schemata .....                                                                               | 255 |
| 2.1 Schemata als modalitätsunspezifische Repräsentationsformate ...                             | 258 |
| 2.2 Gemeinsame Charakteristika von Frames und Schemata .....                                    | 266 |
| 3. Frames als Schemata: eine Beispielanalyse .....                                              | 272 |
| VI. Strukturkonstituenten von Frames .....                                                      | 283 |
| 1. Der Problemzusammenhang .....                                                                | 283 |
| 2. Referenz .....                                                                               | 288 |
| 2.1 Frames als Projektionsfläche der Referentialität .....                                      | 289 |
| 2.2 Jedes Wort evoziert einen Frame .....                                                       | 294 |
| 3. Prädikationspotential: Leerstellen („slots“) .....                                           | 298 |
| 3.1 Was sind Leerstellen? .....                                                                 | 299 |
| 3.2 Hyperonymtypenreduktion: zur Ermittlung von Leerstellen .....                               | 308 |
| 3.3 Eine Beispielanalyse .....                                                                  | 318 |
| 4. Explizite Prädikationen: konkrete Füllwerte („fillers“) .....                                | 325 |

|                                                                              |     |
|------------------------------------------------------------------------------|-----|
| 4.1 Wann sind Prädikationen explizit? .....                                  | 326 |
| 4.2 Sprachliche Ausprägungsvarianten .....                                   | 330 |
| 5. Implizite Prädikationen: Standardwerte („default values“) .....           | 335 |
| 5.1 Rekurrente Schema-Instanzbeziehungen: Token- und Type-<br>Frequenz ..... | 339 |
| 5.2 Kognitive Trampelpfade als Phänomene der dritten Art .....               | 348 |
| 5.3 Type-Frequenz: eine Beispielanalyse .....                                | 356 |
| <br>VII. Frames in Textkorpora: die Metapher der <i>Heuschrecke</i> .....    | 367 |
| 1. Präliminarien .....                                                       | 369 |
| 1.1 Frames als korpuslinguistisches Analyseinstrument .....                  | 369 |
| 1.2 Kognitive und diskursive Aspekte von Metaphern.....                      | 375 |
| 2. Die „Kapitalismus-Debatte“: Exposition des Gegenstandsbereichs... 387     |     |
| 2.1 Diskurs und Korpus.....                                                  | 388 |
| 2.2 Untersuchungszeitraum, Diskursverlauf,<br>Untersuchungskorpus .....      | 392 |
| 2.3 <i>Heuschrecke</i> : eine diskurssemantische Grundfigur .....            | 395 |
| 3. Methodischer Leitfaden zur Korpusanalyse .....                            | 406 |
| 3.1 Annotation der Textbelege.....                                           | 407 |
| 3.2 Prädikationsanalyse.....                                                 | 409 |
| 3.3 Hyperonymtypenreduktion .....                                            | 412 |
| 3.4 Klassifikation expliziter Prädikationen.....                             | 418 |
| 4. Empirische Ergebnisse .....                                               | 421 |
| 4.1 Der generische Frame .....                                               | 422 |
| 4.2 Die Input-Frames „Heuschrecke/n“ und „Finanzinvestor/en“ ..              | 425 |
| 4.3 Der Metapher-Frame „Heuschrecke/n“ .....                                 | 432 |
| 5. Frame-Semantik und Diskursanalyse: einige Schlussfolgerungen.....         | 438 |
| <br>Zusammenfassung und Ausblick .....                                       | 441 |
| <br>Literaturverzeichnis .....                                               | 449 |
| Textkorpus (für die Metaphernanalyse in Kap. VII.) .....                     | 449 |
| Quellen .....                                                                | 452 |
| Sekundärliteratur .....                                                      | 452 |
| <br>Register .....                                                           | 479 |
